# Supplementary material for: In situ QXAFS study of CO and H2 adsorption on Pt in [PtAu8(PPh3)8]-H[PMo12O40] solid
Source: Royal Society of Chemistry journal article supplement (doi:10.1039/d4nr03785e), 2024-11-14
Supplement: d4nr03785e1.pdf [file d4nr03785e1.pdf]

## Supporting Information

---

### ***In situ* QXAFS study on CO and H<sub>2</sub> adsorption on Pt in [PtAu<sub>8</sub>(PPh<sub>3</sub>)<sub>8</sub>]-H[PMo<sub>12</sub>O<sub>40</sub>] solid**

**Tomoki Matsuyama,<sup>a</sup> Taishi Suzuki,<sup>a</sup> Yuto Oba,<sup>a</sup> Soichi Kikkawa,<sup>a</sup> Sayaka, Uchida,<sup>b</sup> Junya Ohyama,<sup>c</sup> Kotaro Higashi,<sup>d</sup> Takuma Kaneko,<sup>d</sup> Kazuo Kato,<sup>d</sup> Kiyofumi Nitta,<sup>d</sup> Tomoya Uruga,<sup>d</sup> Keisuke Hatada,<sup>e</sup> Kazuki Yoshikawa,<sup>e</sup> Amelie Heilmaier,<sup>e,f</sup> Kosuke Suzuki,<sup>g</sup> Kentaro Yonesato,<sup>g</sup> Kazuya Yamaguchi,<sup>g</sup> Naoki Nakatani,<sup>a</sup> Hideyuki Kawasoko,<sup>a,h</sup> and Seiji Yamazoe<sup>\*a</sup>**

<sup>a</sup> Department of Chemistry, Graduate School of Science, Tokyo Metropolitan University, 1-1 Minamiosawa, Hachioji-shi, Tokyo 192-0397, Japan

<sup>b</sup> Department of Basic Science, School of Arts and Sciences, The University of Tokyo, 3-8-1 Komaba, Meguro-ku, Tokyo 153-8902, Japan

<sup>c</sup> Faculty of Advanced Science and Technology, Kumamoto University, 2-39-1 Kurokami, Chuo-ku, Kumamoto-shi, Kumamoto 860-8555, Japan

<sup>d</sup> Center for Synchrotron Radiation Research, Japan Synchrotron Radiation Research Institute (JASRI), 1-1-1, Kouto, Sayo-cho, Sayo-gun, Hyogo 679-5198, Japan

<sup>e</sup> Department of Physics, University of Toyama, 3190 Gofuku, Toyama 930-8555, Japan

<sup>f</sup> Department of Chemistry, Ludwig-Maximilians-Universität (LMU), Butenandtstr. 5-13, 81377 Munich, Germany

<sup>g</sup> Department of Applied Chemistry, School of Engineering, The University of Tokyo, 7-3-1 Hongo, Bunkyo-ku, Tokyo 113-8656, Japan

<sup>h</sup> Precursory Research for Embryonic Science and Technology (PRESTO), Japan Science and Technology Agency (JST), 7, Gobancho, Chiyoda-ku, Tokyo 102-0076, Japan

---

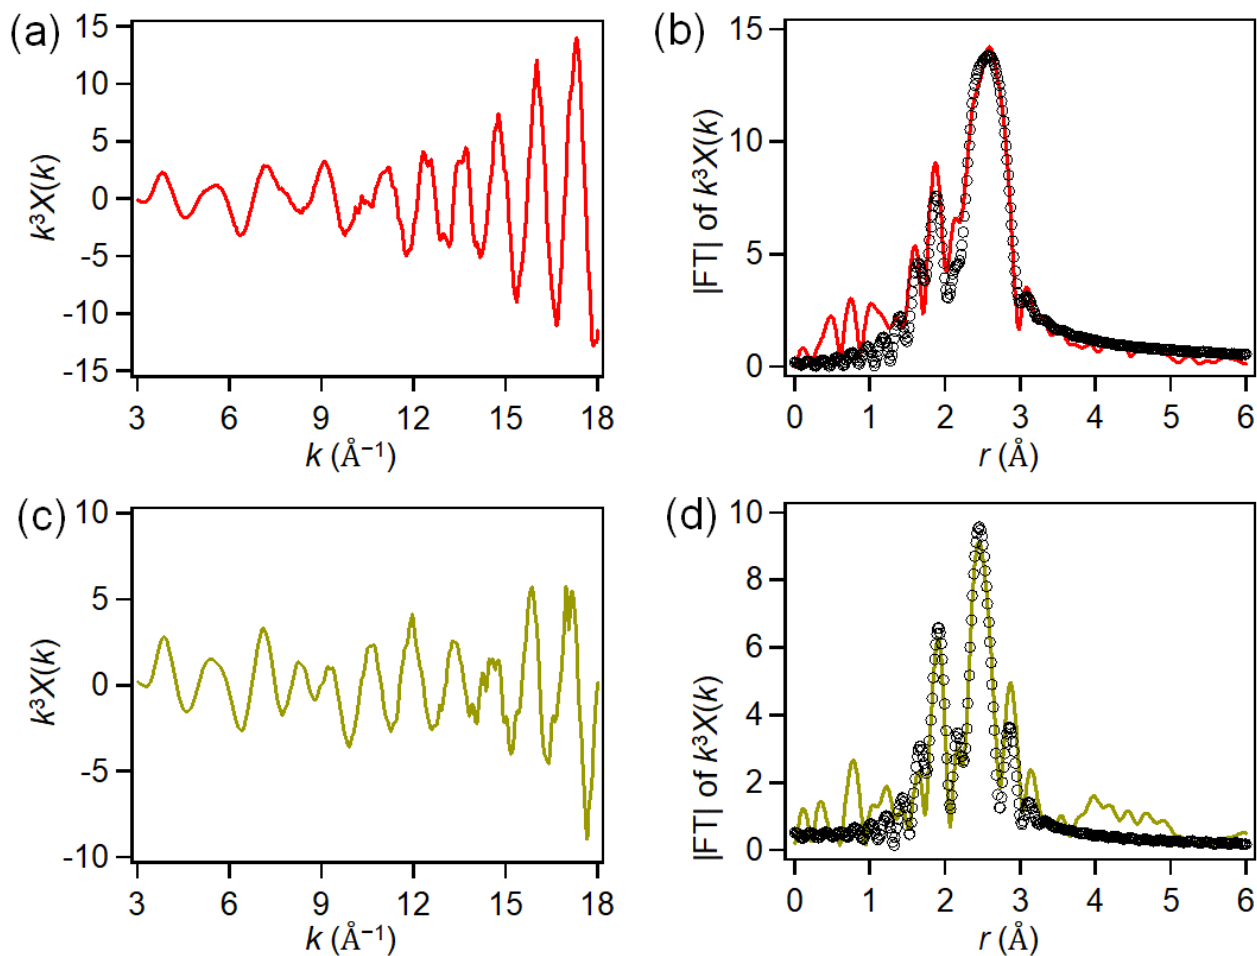

**Fig. S1.** Au L<sub>3</sub>-edge (a) EXAFS oscillation and (b) FT-EXAFS spectra of **PtAu8-PMo12**, and (c) EXAFS oscillation and (d) FT-EXAFS spectra of **Au9-PMo12** measured at 10 K. The circles in (b) and (d) represent the fitting curves, whose parameters and results are listed in Table S1.

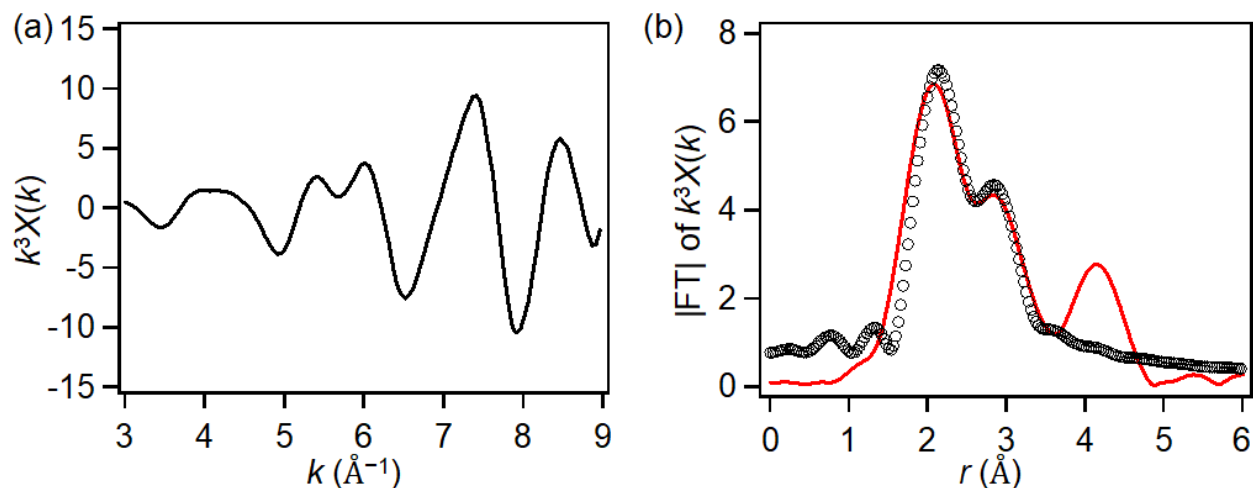

**Fig. S2.** Pt L<sub>3</sub>-edge (a) EXAFS oscillation and (b) FT-EXAFS spectra of **PtAu8-PMo12** measured at 10 K. The circles in (b) represent the fitting curve, whose parameters and results are listed in Table S2.

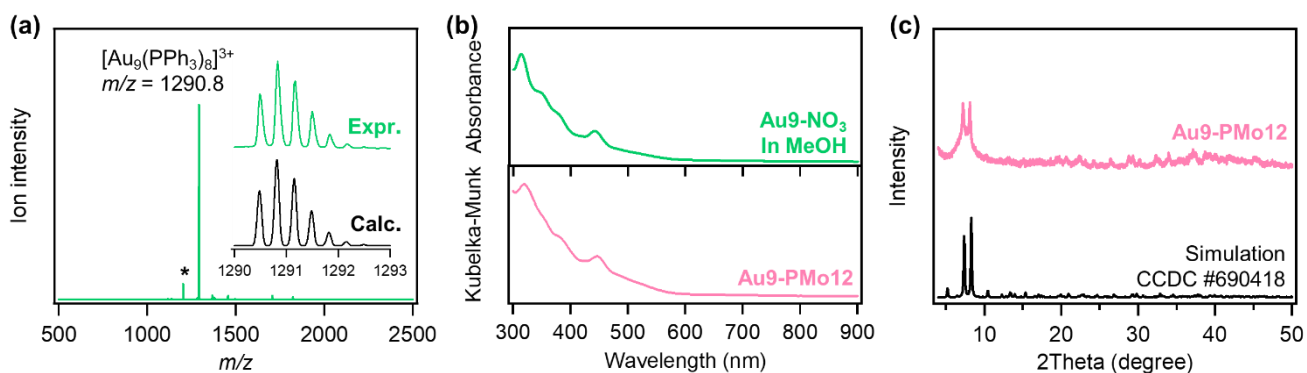

**Fig. S3.** Characterizations of **Au9-NO3** and **Au9-PMo12**. (a) Positive-ion mode ESI-MS of **Au9-NO3** in acetonitrile solution. Asterisk peak is the ligand-dissociated product in the analysis:  $[\text{Au}_9(\text{PPh}_3)_7]^{3+}$ . (b) UV-vis spectrum of **Au9-NO3** in methanol solution and DR-UV-Vis spectrum of **Au9-PMo12**. (c) Powder-XRD pattern of **Au9-PMo12**.

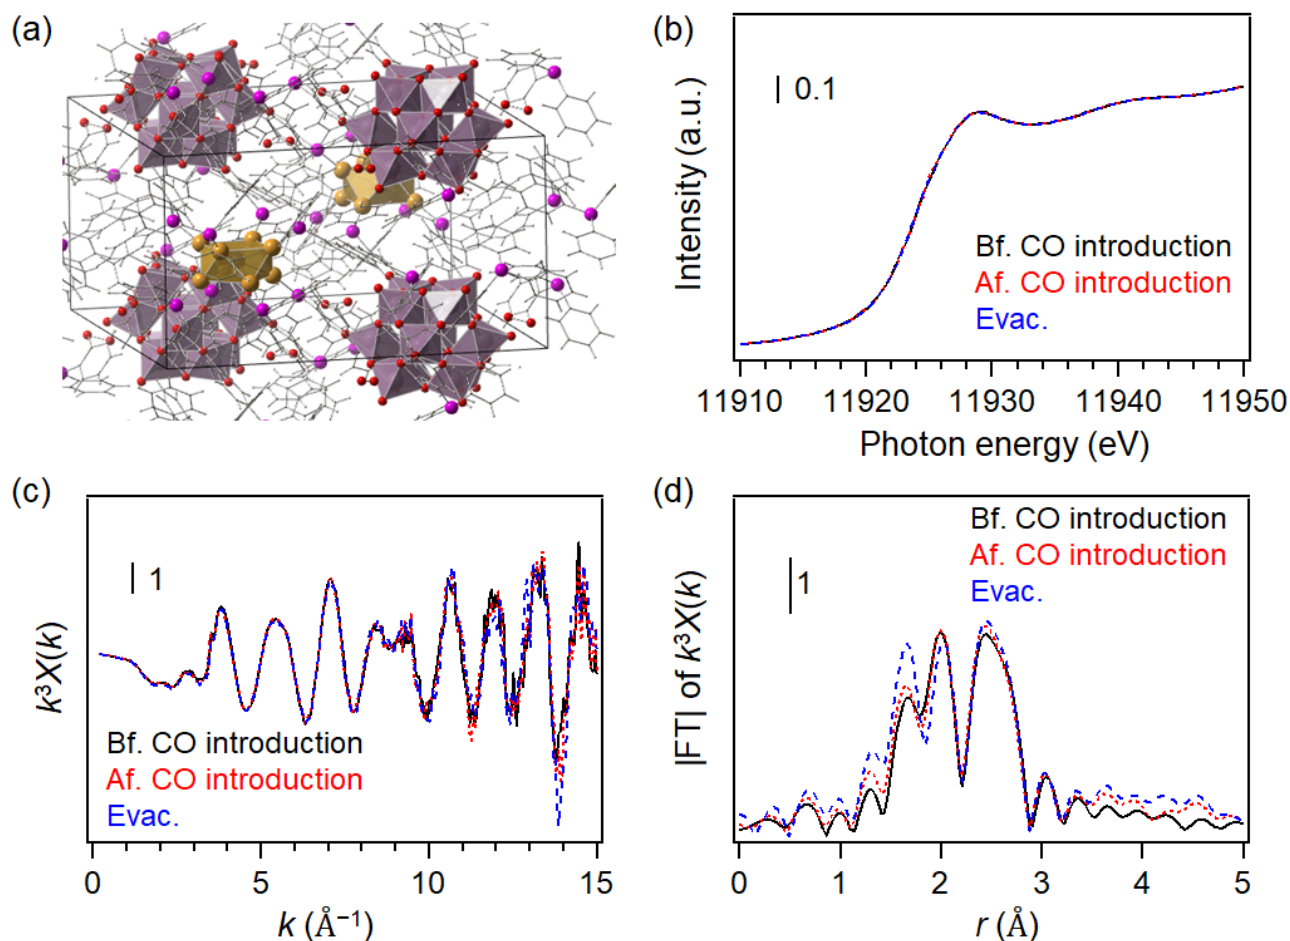

**Fig. S4.** (a) Crystal structure of **Au9-PMo12**.<sup>1</sup> Au L<sub>3</sub>-edge (b) XANES, (c) EXAFS oscillations, and (d) FT-EXAFS spectra of **Au9-PMo12** before CO introduction (black), after CO introduction (red), and then after evacuation (blue).

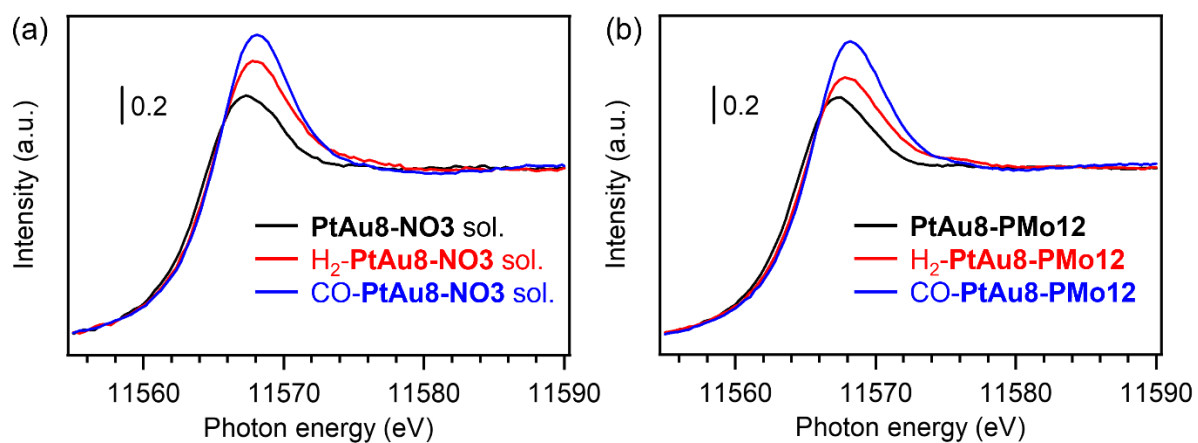

**Fig. S5.** Pt L<sub>3</sub>-edge *in situ* XANES spectra of (a) PtAu<sub>8</sub>-NO<sub>3</sub> in acetonitrile and (b) PtAu<sub>8</sub>-PMo<sub>12</sub> in the solid state. The XAFS data were measured in BL01B1 at SPring-8 facility with using Si(111) mirror to monochromize the incident X-ray.

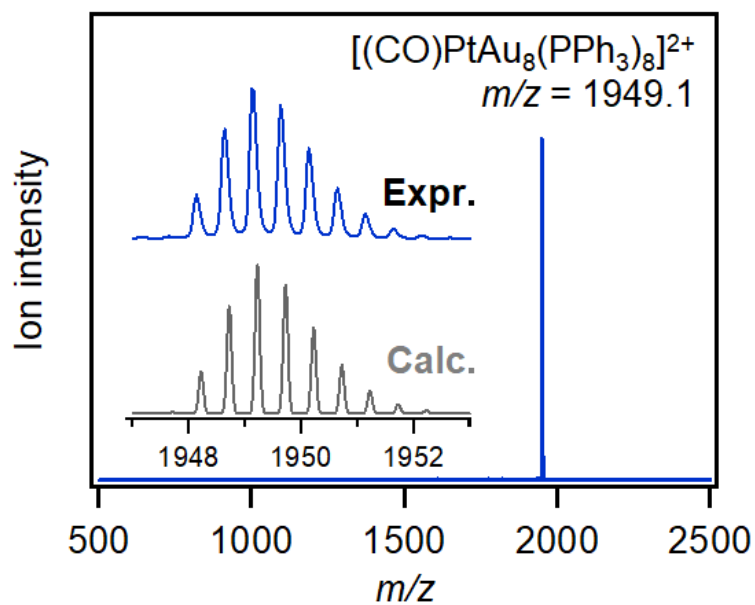

**Fig. S6.** Positive-ion mode ESI-MS of CO-PtAu<sub>8</sub>-PMo<sub>12</sub> dissolved in acetonitrile.

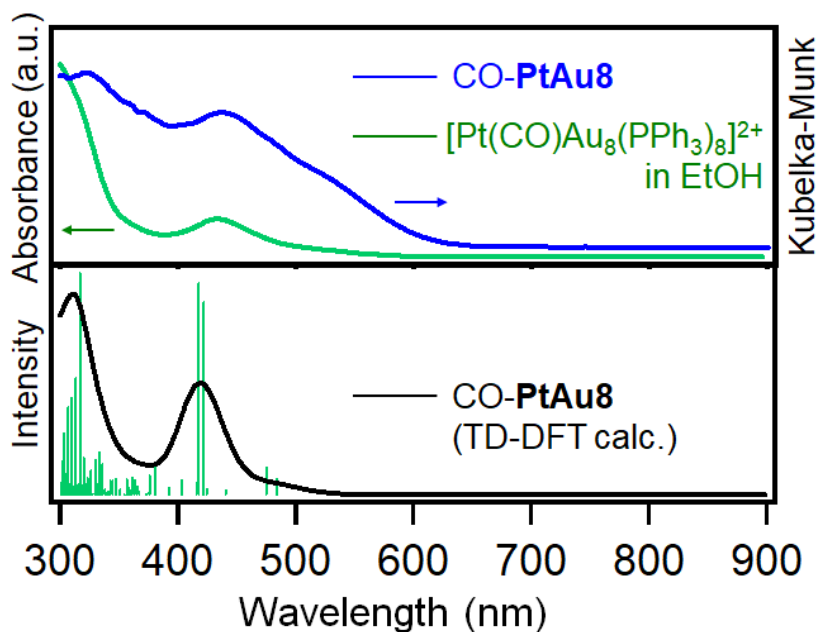

**Fig. S7.** UV-vis spectrum of CO adsorbed **PtAu8** ( $[\text{Pt}(\text{CO})\text{Au}_8(\text{PPh}_3)_8]^{2+}$ ) in ethanol, DR-UV-Vis spectrum of **CO-PtAu8-PMo12**, and calculated UV-Vis spectrum using the optimized structure of **CO-PtAu8** in Fig. 3c,

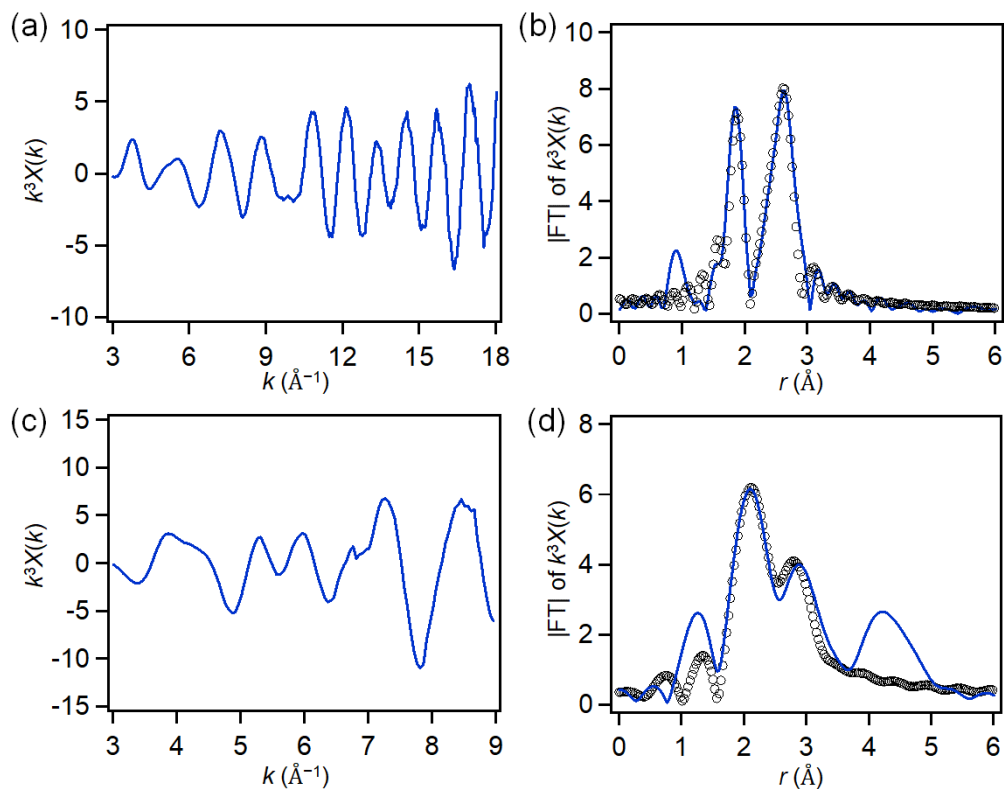

**Fig. S8.** Au  $L_3$ -edge (a) EXAFS oscillation and (b) FT-EXAFS, and Pt  $L_3$ -edge (c) EXAFS oscillation and (d) FT-EXAFS of **CO-PtAu8-PMo12** measured at 10 K. The circles in (b) and (d) represent the fitting curves, whose parameters and results are listed in Table S1.

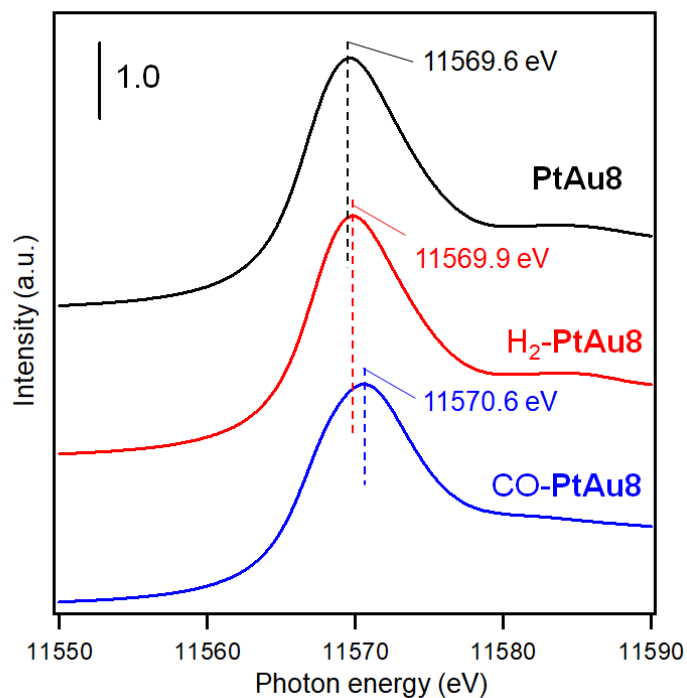

**Fig. S9.** Simulated Pt L<sub>3</sub>-edge XANES of the crown-motif **PtAu<sub>8</sub>**, **H<sub>2</sub>-PtAu<sub>8</sub>** (using optimized structure in Fig. 3f), and the chalice-motif **CO-PtAu<sub>8</sub>** (using optimized structure in Fig. 3c. Energy calibration was carried out using the peak energy (11569.6 eV) of **PtAu<sub>8</sub>-PMo<sub>12</sub>** in Fig. 3a.

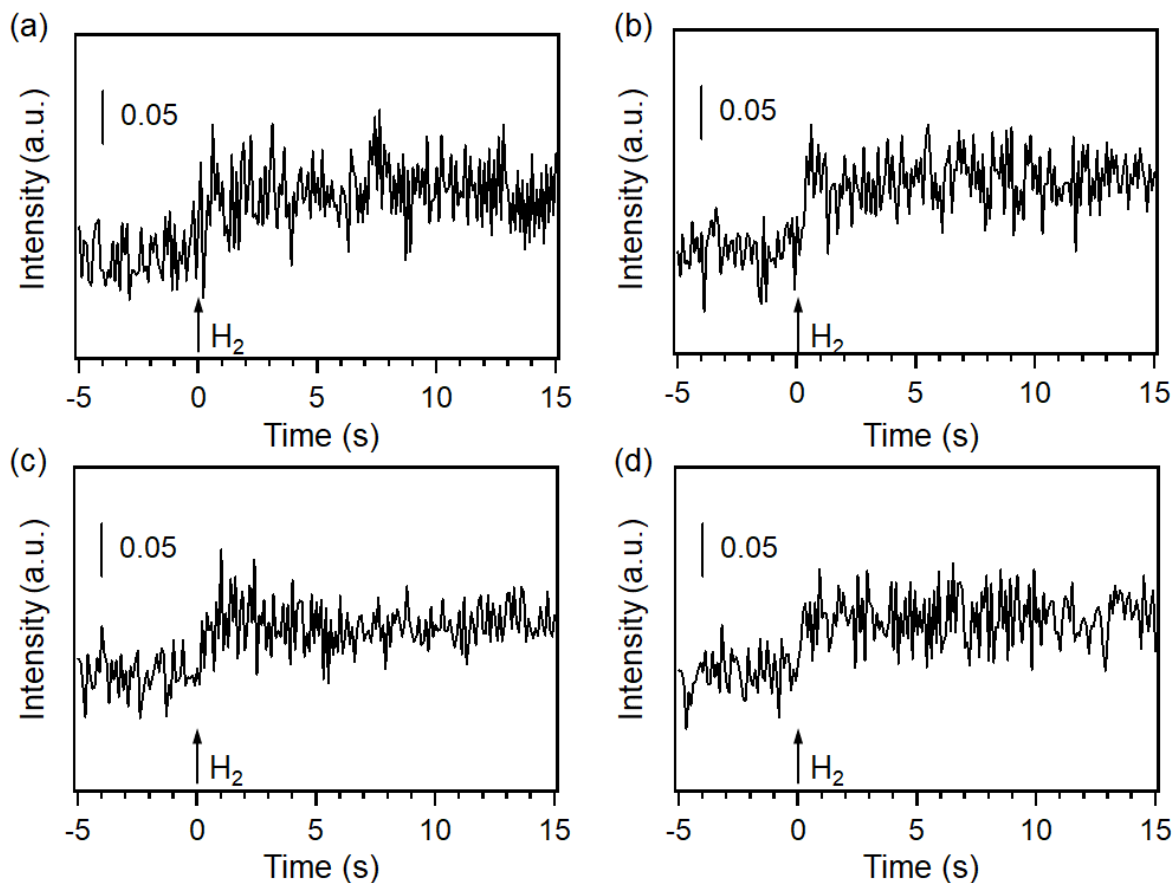

**Fig. S10.** Time course of peak intensity at 11570 eV in Pt L<sub>3</sub>-edge XANES of **PtAu<sub>8</sub>-PMo<sub>12</sub>** during H<sub>2</sub> introduction: (a) 1<sup>st</sup> H<sub>2</sub> introduction, (b) 2<sup>nd</sup> H<sub>2</sub> introduction after evacuation of (a), (c) 3<sup>rd</sup> H<sub>2</sub> introduction after evacuation of (b), (d) 4<sup>th</sup> H<sub>2</sub> introduction after evacuation of (c).

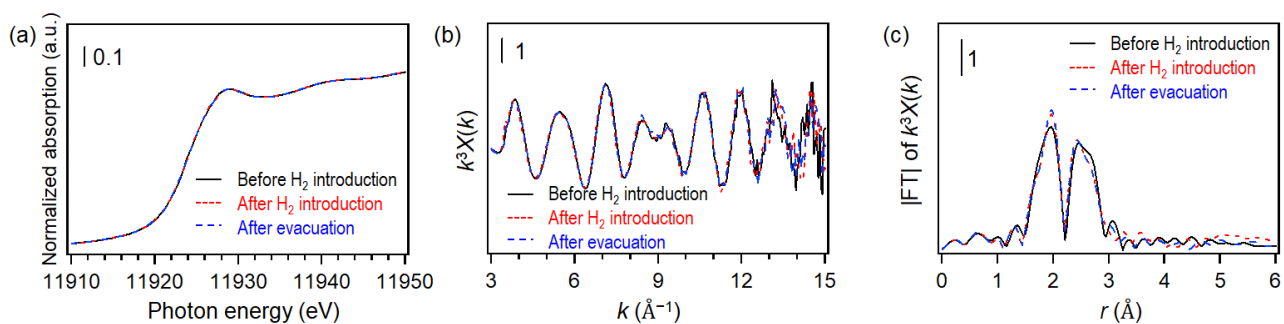

**Fig. S11.** Au L<sub>3</sub>-edge (a) XANES, (b) EXAFS oscillations and (c) FT-EXAFS spectra of Au<sub>9</sub>-PMo<sub>12</sub> before and after H<sub>2</sub> introduction and after evacuation.

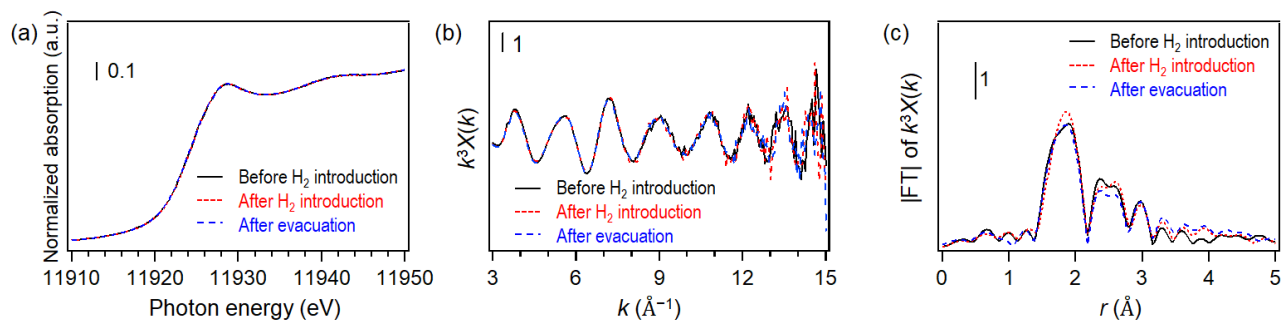

**Fig. S12.** Au L<sub>3</sub>-edge (a) XANES, (b) EXAFS oscillations and (c) FT-EXAFS spectra of PtAu<sub>8</sub>-PMo<sub>12</sub> before and after H<sub>2</sub> introduction and after evacuation.

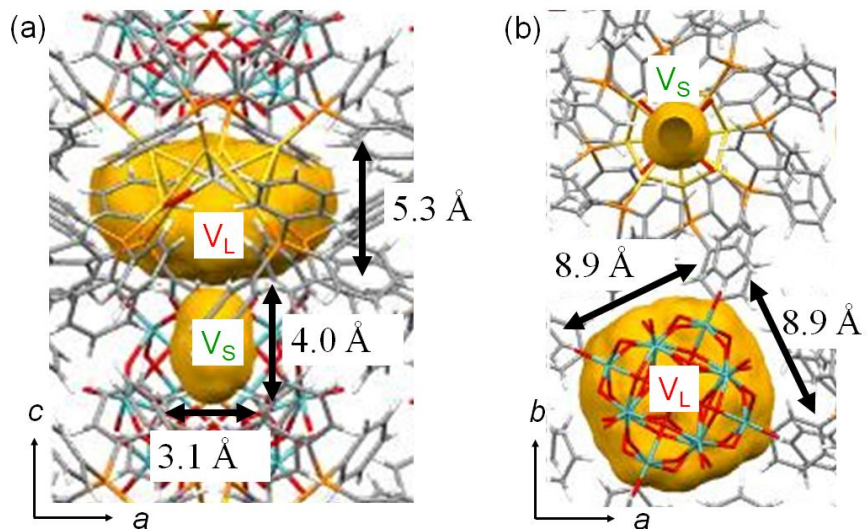

**Fig. S13.** Size of the closed voids in PtAu<sub>8</sub>-PMo<sub>12</sub>.

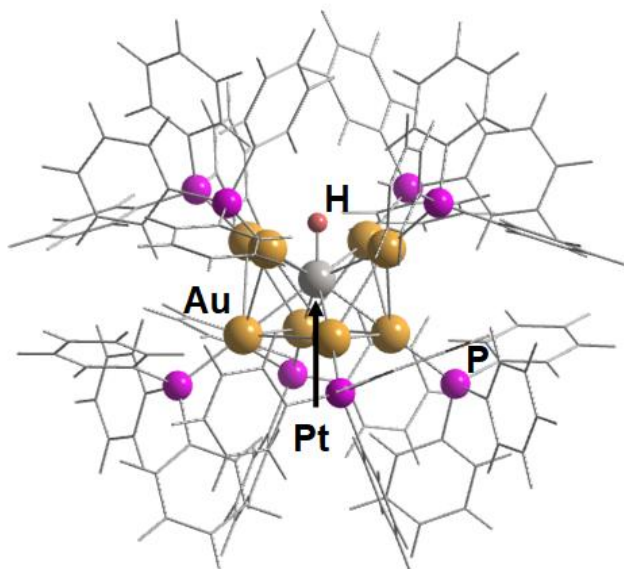

**Fig. S14.** Optimized structure of H-PtAu8.

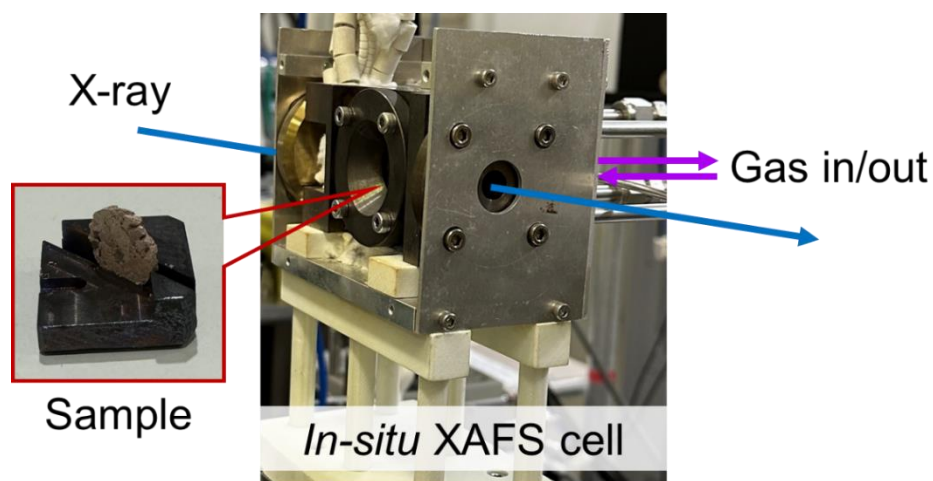

**Fig. S15.** Experimental setup for *in situ* XAFS measurement of solid samples at SPring-8.

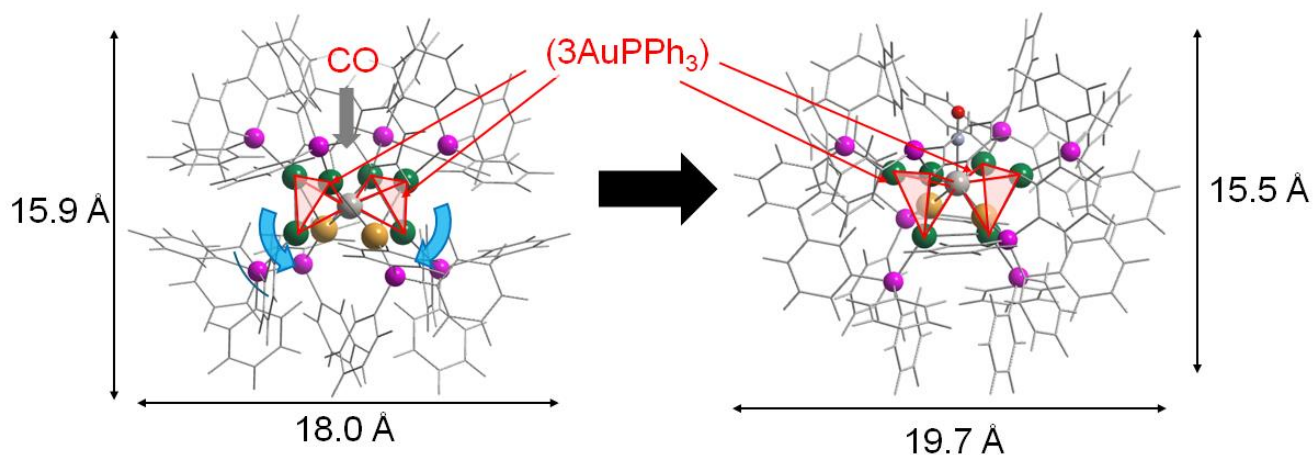

**Scheme S1.** Proposed structural isomerization mechanism from crown-motif **PtAu8** to chalice-motif **PtAu8** and cluster size obtained by optimized structures of crown-motif **PtAu8** and chalice-motif **PtAu8** by DFT calculations. Color; gray: Pt, green: Au in (3AuPPh<sub>3</sub>) unit, pink: P.

**Table S1.** Curve fitting results of Au L<sub>3</sub>-edge FT-EXAFS spectra for **PtAu8-PMo12**, **CO-PtAu8-PMo12**, and **Au9-PMo12**.

| Samples               | Bonds  | CNs     | <i>r</i> (Å) | σ <sup>2</sup> | R-factor(%) |
|-----------------------|--------|---------|--------------|----------------|-------------|
| <b>PtAu8-PMo12</b>    | Au-P   | 1.4 (2) | 2.20 (3)     | 0.003 (2)      | 13.2        |
|                       | Au-Pt  | 1.4 (1) | 2.66 (2)     | 0.002 (1)      |             |
|                       | Au-Au  | 2.3 (2) | 2.80 (2)     | 0.004 (2)      |             |
| <b>CO-PtAu8-PMo12</b> | Au-P   | 1.0 (2) | 2.23 (3)     | 0.002 (1)      | 14.9        |
|                       | Au-Pt  | 1.3 (1) | 2.69 (2)     | 0.003 (1)      |             |
|                       | Au-Au  | 3.6 (7) | 2.93 (11)    | 0.014 (11)     |             |
| <b>Au9-PMo12</b>      | Au-P   | 1.4 (2) | 2.28 (4)     | 0.004 (3)      | 11.4        |
|                       | Au-Au1 | 1.4 (1) | 2.67 (2)     | 0.003 (2)      |             |
|                       | Au-Au2 | 1.9 (2) | 2.78 (3)     | 0.005 (2)      |             |

CNs: coordination numbers, *r*: bond distance, σ<sup>2</sup>: Debye–Waller factor.

Numbers in parentheses represent uncertainties. The reliability factor (R-factor) is defined as:

R-factor =  $\{\Sigma[k^3 \chi_{\text{obs}}(k) - k^3 \chi_{\text{cal}}(k)]^2 / \Sigma[k^3 \chi_{\text{obs}}(k)]^2\}^{1/2}$  where,  $\chi_{\text{obs}}$  and  $\chi_{\text{cal}}$  correspond to the observed and calculated data, respectively.

**Table S2.** Curve fitting results of Pt L<sub>3</sub>-edge FT-EXAFS spectra for **PtAu8-PMo12** and **CO-PtAu8-PMo12**.

| Samples               | Bonds | CNs     | <i>r</i> (Å) | σ <sup>2</sup> | R-factor(%) |
|-----------------------|-------|---------|--------------|----------------|-------------|
| <b>PtAu8-PMo12</b>    | Pt-Au | 7.8 (3) | 2.63 (3)     | 0.003 (2)      | 12.3        |
| <b>CO-PtAu8-PMo12</b> | Pt-C  | 1.3 (3) | 1.81 (10)    | 0.020 (17)     | 12.0        |
|                       | Pt-Au | 8.0 (4) | 2.64 (3)     | 0.005 (4)      |             |

CNs: coordination numbers, *r*: bond distance, σ<sup>2</sup>: Debye–Waller factor.

Numbers in parentheses represent uncertainties. The reliability factor (R-factor) is defined as:

R-factor =  $\{\Sigma[k^3 \chi_{\text{obs}}(k) - k^3 \chi_{\text{cal}}(k)]^2 / \Sigma[k^3 \chi_{\text{obs}}(k)]^2\}^{1/2}$  where,  $\chi_{\text{obs}}$  and  $\chi_{\text{cal}}$  correspond to the observed and calculated data, respectively.

**Table S3.** Structural parameters of **CO-PtAu8** in Au L<sub>3</sub>- and Pt L<sub>3</sub>-edges obtained by the DFT calculation.

| Sample                                                                  | Edge              | Bonds | CNs | <i>r</i> (Å) |
|-------------------------------------------------------------------------|-------------------|-------|-----|--------------|
| <b>[Pt(CO)Au<sub>8</sub>(PPh<sub>3</sub>)<sub>8</sub>]<sup>2+</sup></b> | Au L <sub>3</sub> | Au-P  | 1.0 | 2.43[2.30]   |
|                                                                         |                   | Au-Pt | 1.0 | 2.79[2.64]   |
|                                                                         |                   | Au-Au | 3.8 | 3.14[2.97]   |
|                                                                         | Pt L <sub>3</sub> | Pt-C  | 1.0 | 1.91[1.81]   |
|                                                                         |                   | Pt-Au | 8.0 | 2.79[2.64]   |
|                                                                         |                   |       |     |              |

Bond lengths determined by the average bond lengths for the model structures. Numbers in square brackets are bond lengths reduced to 94.6% of their original values.<sup>2</sup>

## References

- 1 M. Schulz-Dobrick and M. Jansen, *Z. Anorg. Allg. Chem.*, 2008, **634**, 2880–2884.
- 2 Y. Fujiki, T. Matsuyama, S. Kikkawa, J. Hirayama, H. Takaya, N. Nakatani, N. Yasuda, K. Nitta, Y. Negishi and S. Yamazoe, *Commun. Chem.*, 2023, **6**, 129.
